# Supplementary material for: Lactobacillus plantarumHNU082 alleviates dextran sulfate sodium-induced ulcerative colitis in mice through regulating gut microbiome
Source: Royal Society of Chemistry journal article supplement (doi:10.1039/d2fo02303b), 2022-01-01
Supplement: d2fo02303b1.pdf [file d2fo02303b1.pdf]

### Supplementary figure legends

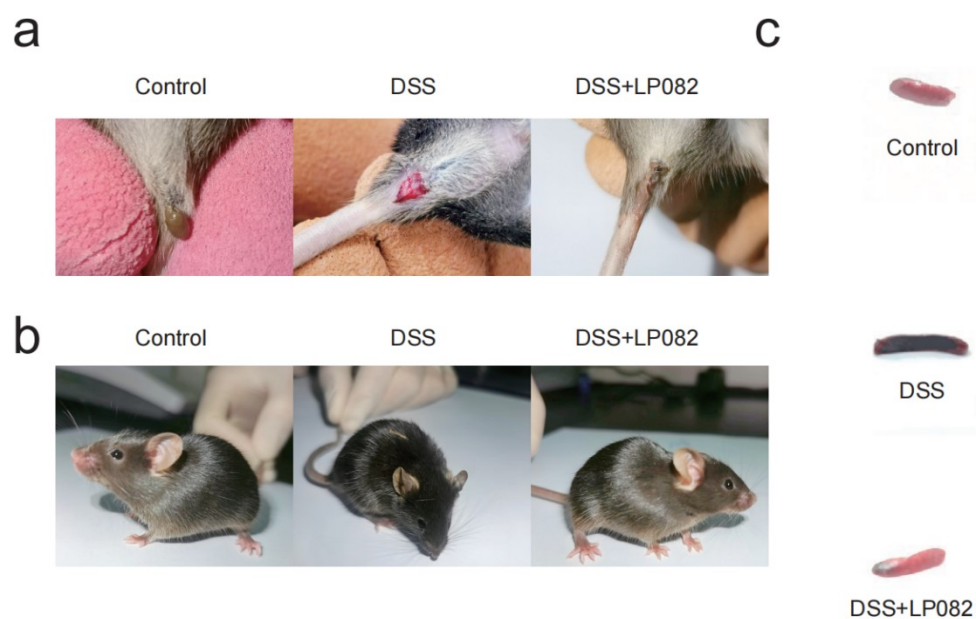

**Fig. S1.**

(a) Blood in the stool of experimental mice.

(b) Mental state of experimental mice.

(c) Spleen condition of experimental mice.

## Supplementary figure legends

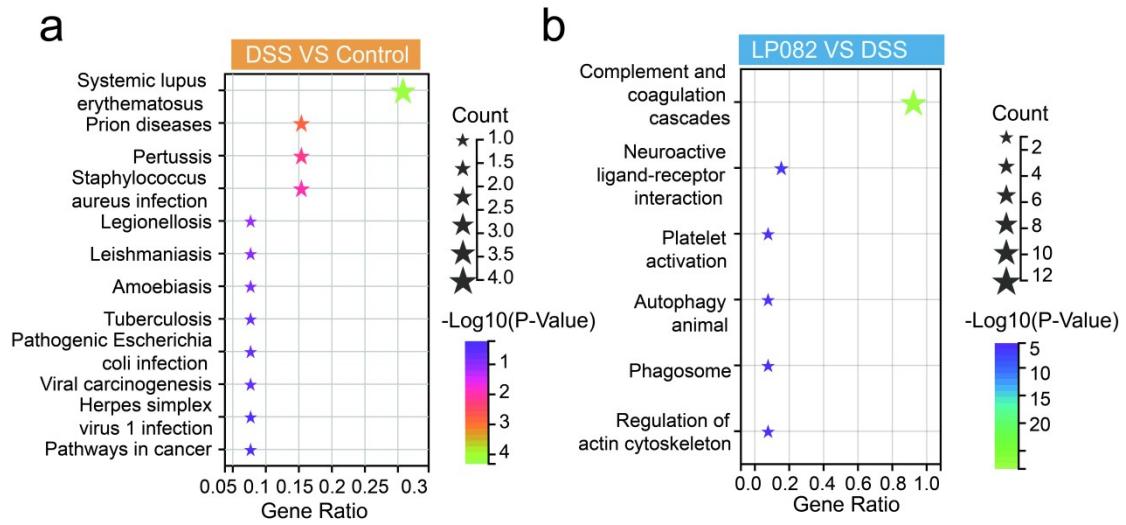

**Fig. S2.**

(a) KEGG pathway enriched by differentially expressed genes between DSS and control groups.

(b) KEGG pathway enriched by differentially expressed genes between LP082 and DSS groups.

### Supplementary table legends

| Score | Weight loss (%) | Stool consistency                                                                                   | Visible blood in faeces                       |
|-------|-----------------|-----------------------------------------------------------------------------------------------------|-----------------------------------------------|
| 0     | 0               | Normal                                                                                              | Normal                                        |
| 1     | 1~5             | Loose state, which is pasty and semi-formed stool that does not adhere to anus                      | Positive for fecal occult blood test          |
| 2     | 6~10            | Obvious loose state, which is a pasty and basically unformed stool that does not adhere to the anus | Strongly positive for fecal occult blood test |
| 3     | 11~15           | Dilute stool is a watery stool that can adhere to the anus                                          | Visible blood in faeces                       |
| 4     | ≥16             | The degree of loose stool is more obvious, and the thin water sample is more clear and long         | Obviously visible blood in faeces             |

**Table S1.**

Disease activity index scoring system of dextran sodium sulfate-induced colitis.

## Supplementary table legends

| <b>Project</b>                   | <b>Degree</b>                            | <b>Score</b> |
|----------------------------------|------------------------------------------|--------------|
| <b>Inflammation</b>              | None                                     | 0            |
|                                  | Mild or few                              | 1            |
|                                  | Moderate                                 | 2            |
|                                  | Severe massive                           | 3            |
|                                  | Extremely severe and massive             | 4            |
| <b>Depth of inflammation</b>     | None                                     | 0            |
|                                  | Submucosal layer                         | 1            |
|                                  | muscular layer                           | 2            |
|                                  | Serous layer                             | 3            |
|                                  | Transmural                               | 4            |
| <b>Range of inflammation (%)</b> | 0                                        | 0            |
|                                  | 1~25                                     | 1            |
|                                  | 26~50                                    | 2            |
|                                  | 51~75                                    | 3            |
|                                  | 76~100                                   | 4            |
| <b>Crypts damage</b>             | None                                     | 0            |
|                                  | 1/3 crypt of basement was destroyed      | 1            |
|                                  | 2/3 crypt of basement was destroyed      | 2            |
|                                  | Only intact surface epithelium           | 3            |
|                                  | All crypts and epithelium were destroyed | 4            |
| <b>Goblet cells loss</b>         | None                                     | 0            |
|                                  | 1~25%                                    | 1            |
|                                  | 26~50%                                   | 2            |
|                                  | 51~75%                                   | 3            |

|                                                  |                                           |   |
|--------------------------------------------------|-------------------------------------------|---|
|                                                  | 75~100%                                   | 4 |
| <b>The degree of<br/>neutrophil infiltration</b> | None                                      | 0 |
|                                                  | Crypt base infiltration                   | 1 |
|                                                  | Muscularis mucosae infiltrate             | 2 |
|                                                  | Muscularis mucosae severity<br>infiltrate | 3 |
|                                                  | Mucosal thickening and edema              |   |
|                                                  | Submucosal infiltration                   | 4 |

**Table S2.**

Histopathology scoring system of dextran sodium sulfate-induced colitis.
